# Supplementary material for: Microenvironmental Heterogeneity Parallels Breast Cancer Progression: A Histology–Genomic Integration Analysis
Source: PubMed Central journal article supplement (PMC4755617; doi:10.1371/journal.pmed.1001961), 2016-02-16
Supplement: pmed.1001961.s013.pdf [file pmed.1001961.s013.pdf]

|         |   |   |   |   |    |     |    |   |    |          |   |   |   |        |    |    |                 |         |
|---------|---|---|---|---|----|-----|----|---|----|----------|---|---|---|--------|----|----|-----------------|---------|
| MB-0663 | 2 | 4 | 0 | 1 | 3  | neg | 3  | 2 | 1  | IDC      | - | - | + | Her2   | 5  | 1  | c.714del1       | p.?     |
| MB-0664 | 2 | 5 | 1 | 3 | 3  | neg | NA | 0 | 1  | IDC      | - | - | - | Basal  | 10 | 1  | c.812del1       | p.?     |
| MB-0666 | 2 | 2 | 1 | 2 | 3  | pos | 1  | 0 | 0  | IDC      | + | + | - | LumA   | 9  | 0  |                 |         |
| MB-0667 | 2 | 3 | 1 | 2 | 3  | pos | NA | 2 | 0  | IDC      | + | + | + | LumB   | 1  | 0  |                 |         |
| MB-0869 | 2 | 1 | 0 | 2 | 3  | neg | NA | 0 | 1  | IDC      | - | - | - | Basal  | 10 | 1  | c.637C>T        | p.R213X |
| MB-0872 | 2 | 2 | 1 | 1 | 2  | pos | NA | 0 | 0  | IDC      | + | + | - | Normal | 7  | 0  |                 |         |
| MB-0874 | 2 | 3 | 0 | 2 | 3  | neg | NA | 0 | 1  | IDC      | - | - | - | Basal  | 10 | 1  | c.839G>C        | p.R280T |
| MB-0876 | 2 | 3 | 0 | 1 | NA | NA  | NA | 0 | NA | DCIS     | - | - | - | Basal  | 4  | NA | NA              | NA      |
| MB-0877 | 2 | 5 | 1 | 2 | 3  | pos | NA | 0 | 1  | IDC      | + | + | - | LumB   | 6  | 1  | c.743G>A        | p.R248Q |
| MB-0880 | 2 | 2 | 0 | 2 | 1  | pos | NA | 0 | 0  | IDC      | + | + | - | LumA   | 7  | 0  |                 |         |
| MB-0882 | 2 | 3 | 0 | 2 | 3  | pos | NA | 0 | 1  | IDC+ILC  | + | + | - | LumB   | 7  | 1  | c.637C>T        | p.R213X |
| MB-0884 | 2 | 4 | 1 | 2 | 3  | pos | 1  | 0 | 1  | IDC      | + | - | - | LumB   | 9  | 1  | c.651_652ins23  | p.?     |
| MB-0885 | 2 | 2 | 0 | 1 | NA | NA  | NA | 0 | NA | PHYL     | - | - | - | Normal | 4  | NA | NA              | NA      |
| MB-0891 | 2 | 5 | 1 | 2 | 1  | pos | NA | 0 | 0  | IDC-TLUB | + | - | - | LumA   | 3  | 0  |                 |         |
| MB-0893 | 2 | 2 | 1 | 2 | 3  | pos | NA | 0 | 0  | IDC      | - | - | - | Basal  | 4  | 0  |                 |         |
| MB-0895 | 2 | 4 | 1 | 1 | 3  | pos | NA | 2 | 1  | IDC      | + | + | + | LumB   | 5  | 1  | c.730G>A        | p.G244S |
| MB-0897 | 2 | 3 | 1 | 2 | 2  | NA  | NA | 0 | 0  | IDC+ILC  | + | + | - | Normal | 4  | 0  |                 |         |
| MB-0899 | 2 | 2 | 1 | 2 | 2  | pos | NA | 0 | 0  | IDC      | + | + | - | LumA   | 8  | 0  |                 |         |
| MB-0901 | 2 | 3 | 1 | 2 | 3  | neg | NA | 0 | 1  | IDC      | - | - | - | Basal  | 10 | 1  |                 |         |
| MB-0904 | 2 | 5 | 1 | 2 | 2  | pos | NA | 0 | 0  | IDC      | + | + | - | LumA   | 3  | 0  | c.390_427del137 | p.?     |
| MB-0906 | 2 | 4 | 0 | 2 | 3  | neg | NA | 0 | 0  | IDC      | - | - | - | Normal | 4  | 0  |                 |         |
| MB-0907 | 2 | 3 | 0 | 2 | NA | NA  | NA | 2 | NA | DCIS     | - | - | + | Normal | 4  | NA | NA              | NA      |
