# Supplementary material for: Microenvironmental Heterogeneity Parallels Breast Cancer Progression: A Histology–Genomic Integration Analysis
Source: PubMed Central journal article supplement (PMC4755617; doi:10.1371/journal.pmed.1001961), 2016-02-16
Supplement: pmed.1001961.s014.pdf [file pmed.1001961.s014.pdf]

Supplementary Table 2: Copy number alterations significantly enriched in EDI-high, grade 3 breast tumors.

| Symbol      | Symbol2   | Cytoband     | npval    | gain | loss | CN.and.z | description                                                                             |
|-------------|-----------|--------------|----------|------|------|----------|-----------------------------------------------------------------------------------------|
| UBE2K       | HIP2      | 4p14b        | 7.20E-05 |      | 2    | 27       | 13 ubiquitin-conjugating enzyme E2K                                                     |
| PDS5A       | PDS5A     | 4p14b        | 0.00012  |      | 2    | 28       | 13 PDS5, regulator of cohesion maintenance, homolog A (S. cerevisiae)                   |
| LIAS        | LIAS      | 4p14b        | 0.00012  |      | 2    | 28       | 13 lipoic acid synthetase                                                               |
| UGDH        | UGDH      | 4p14b        | 0.00012  |      | 2    | 28       | 13 UDP-glucose 6-dehydrogenase                                                          |
| C4orf34     | C4orf34   | 4p14b        | 0.00012  |      | 2    | 28       | 13 chromosome 4 open reading frame 34                                                   |
| GPR17       | GPR17     | 2q14.3e      | 2.00E-04 |      | 12   | 6        | 9 G protein-coupled receptor 17                                                         |
| LIMS2       | LIMS2     | 2q14.3e      | 2.00E-04 |      | 12   | 6        | 9 LIM and senescent cell antigen-like domains 2                                         |
| MYO7B       | MYO7B     | 2q14.3d-q14  | 2.00E-04 |      | 12   | 6        | 9 myosin VIIB                                                                           |
| hCG_17324   | LOC654134 |              | 0.00029  |      | 6    | 4        | 6                                                                                       |
| TMEM177     | TMEM177   | 2q14.2c      | 0.00029  |      | 6    | 4        | 6 transmembrane protein 177                                                             |
| CMPK1       | CMPK1     | 1p33d        | 0.00031  |      | 20   | 16       | 14 cytidine monophosphate (UMP-CMP) kinase 1, cytosolic                                 |
| DKFZp313115 | LOC651436 |              | 0.00035  |      | 2    | 27       | 12                                                                                      |
| KLB         | KLB       | 4p14c-p14b   | 0.00035  |      | 2    | 27       | 12 klotho beta                                                                          |
| RPL9        | RPL9      | 4p14b        | 0.00035  |      | 2    | 27       | 12 ribosomal protein L9                                                                 |
|             | LOC647859 | 5q13.2b      | 0.00036  |      | 7    | 41       | 17 occludin pseudogene                                                                  |
| OCLN        | OCLN      | 5q13.2a      | 0.00036  |      | 7    | 41       | 17 occludin                                                                             |
| IWS1        | IWS1      | 2q14.3d      | 0.00037  |      | 8    | 5        | 7 IWS1 homolog (S. cerevisiae)                                                          |
| PROC        | PROC      | 2q14.3d      | 0.00037  |      | 8    | 5        | 7 protein C (inactivator of coagulation factors Va and VIIIa)                           |
| MAP3K2      | LOC651319 |              | 0.00037  |      | 8    | 5        | 7 mitogen-activated protein kinase kinase kinase 2                                      |
| LYPD6B      | LOC130576 | 2q23.2a      | 0.00037  |      | 7    | 6        | 7 LY6/PLAUR domain containing 6B                                                        |
| BC035647    | LOC642049 |              | 0.00046  |      | 42   | 15       | 19                                                                                      |
| LOC344967   | LOC344967 | 4p14b        | 0.00053  |      | 1    | 29       | 12 acyl-CoA thioesterase 7 pseudogene                                                   |
| C17orf71    | C17orf71  | 17q22d       | 0.00064  |      | 96   | 17       | 31                                                                                      |
| GDPD1       | GDPD1     | 17q22d       | 0.00066  |      | 101  | 17       | 32 glycerophosphodiester phosphodiesterase domain containing 1                          |
| SMA4        | LOC643373 | 5p13.3a      | 0.00066  |      | 7    | 35       | 15 glucuronidase, beta pseudogene                                                       |
| GTf2H2D     | LOC728340 | 5q13.2a      | 0.00066  |      | 7    | 35       | 15 general transcription factor IIH, polypeptide 2D                                     |
| AL049987    | LOC728499 | 5q13.2a      | 0.00066  |      | 7    | 35       | 15 POM121 membrane glycoprotein (rat) pseudogene                                        |
| BC064850    | LOC728452 | 5q13.2b      | 0.00066  |      | 7    | 35       | 15 POM121 membrane glycoprotein (rat) pseudogene                                        |
| GTf2H2C     | LOC653238 | 5q13.2a      | 0.00066  |      | 7    | 35       | 15 general transcription factor IIH, polypeptide 2, 44kDa                               |
| GTf2H2C     | LOC653866 |              | 0.00066  |      | 7    | 35       | 15 general transcription factor IIH, polypeptide 2C                                     |
| DKFZp686P0  | LOC653489 | 2q12.2b      | 0.00069  |      | 5    | 6        | 6                                                                                       |
| CNTNAP5     | CNTNAP5   | 2q14.3b-q14  | 0.00069  |      | 5    | 6        | 6 contactin associated protein-like 5                                                   |
| ARLSA       | ARLSA     | 2q23.3c      | 0.00069  |      | 5    | 6        | 6 ADP-ribosylation factor-like 5A                                                       |
| INSIG2      | INSIG2    | 2q14.1d      | 0.00074  |      | 3    | 3        | 4 insulin induced gene 2                                                                |
| CCDC93      | FLJ10996  | 2q14.1d      | 0.00074  |      | 3    | 3        | 4 coiled-coil domain containing 93                                                      |
| KIAA0531    | KIF5C     | 2q23.1b      | 0.00075  |      | 8    | 6        | 7 kinesin family member 5C                                                              |
| LYPD6       | LYPD6     | 2q23.2a      | 0.00075  |      | 7    | 7        | 7 LY6/PLAUR domain containing 6                                                         |
| RFC1        | RFC1      | 4p14c        | 0.00078  |      | 3    | 28       | 12 replication factor C (activator 1) 1, 145kDa                                         |
| WDR19       | WDR19     | 4p14c        | 0.00078  |      | 3    | 28       | 12 WD repeat domain 19                                                                  |
| BRWD1       | BRWD1     | 21q22.2a-q2: | 0.00089  |      | 32   | 7        | 14 bromodomain and WD repeat domain containing 1                                        |
| PCTP        | PCTP      | 17q22b       | 0.00091  |      | 89   | 2        | 26 phosphatidylcholine transfer protein                                                 |
| AKAP1       | AKAP1     | 17q22c       | 0.0011   |      | 101  | 5        | 29 A kinase (PKA) anchor protein 1                                                      |
| DHX40       | DHX40     | 17q23.1a     | 0.0011   |      | 111  | 10       | 32 DEAH (Asp-Glu-Ala-His) box polypeptide 40                                            |
| BCAS3       | BCAS3     | 17q23.2a-q2: | 0.0011   |      | 125  | 6        | 34 breast carcinoma amplified sequence 3                                                |
| RPS6K81     | RPS6K81   | 17q23.1a     | 0.0011   |      | 117  | 9        | 33 ribosomal protein S6 kinase, 70kDa, polypeptide 1                                    |
| RNFT1       | LOC645294 | 17p11.2c     | 0.0011   |      | 116  | 10       | 33 ring finger protein, transmembrane 1                                                 |
| TUBD1       | TUBD1     | 17q23.1a     | 0.0011   |      | 116  | 10       | 33 tubulin, delta 1                                                                     |
| EDIL3       | EDIL3     | 5q14.3a      | 0.0011   |      | 17   | 35       | 17 EGF-like repeats and discoidin I-like domains 3                                      |
| RPL23AP12   | LOC391282 | 21q22.2a     | 0.0012   |      | 29   | 7        | 13 ribosomal protein L23a pseudogene 12                                                 |
| FLJ45139    | FLJ45139  | 21q22.2a     | 0.0012   |      | 29   | 7        | 13 FLJ45139 protein                                                                     |
| DNAJC27     | DNAJC27   | 2p23.3c      | 0.0012   |      | 25   | 11       | 13 DnaJ (Hsp40) homolog, subfamily C, member 27                                         |
| MBOAT2      | MBOAT2    | 2p25.1e      | 0.0012   |      | 31   | 5        | 13 membrane bound O-acyltransferase domain containing 2                                 |
| CCNY        | CCNY      | 10p11.21c    | 0.0012   |      | 35   | 9        | 15 cyclin Y                                                                             |
| ACTBL3      | LOC646855 |              | 0.0012   |      | 12   | 6        | 8                                                                                       |
| CHST10      | CHST10    | 2q11.2d      | 0.0012   |      | 10   | 8        | 8 carbohydrate sulfotransferase 10                                                      |
| C17orf67    | LOC650311 |              | 0.0012   |      | 98   | 4        | 28 chromosome 17 open reading frame 67                                                  |
| DGKE        | DGKE      | 17q22c       | 0.0012   |      | 98   | 4        | 28 diacylglycerol kinase, epsilon 64kDa                                                 |
| FOXE3       | FOXE3     | 1p33d        | 0.0012   |      | 24   | 16       | 14 forkhead box E3                                                                      |
| C2orf76     | C2orf76   | 2q14.2b      | 0.0013   |      | 6    | 3        | 5 chromosome 2 open reading frame 76                                                    |
| EN1         | EN1       | 2q14.2b      | 0.0013   |      | 7    | 2        | 5 engrailed homeobox 1                                                                  |
| AFF3        | AFF3      | 2q11.2c-q11. | 0.0014   |      | 10   | 5        | 7 AF4/FMR2 family, member 3                                                             |
| REV1        | REV1      | 2q11.2c      | 0.0014   |      | 10   | 5        | 7 REV1 homolog (S. cerevisiae)                                                          |
| EIF5B       | EIF5B     | 2q11.2c      | 0.0014   |      | 10   | 5        | 7 eukaryotic translation initiation factor 5B                                           |
| RAPGEF4     | RAPGEF4   | 2q31.1e      | 0.0014   |      | 11   | 4        | 7 Rap guanine nucleotide exchange factor (GEF) 4                                        |
| KIF5C       | KIF5C     | 2q23.1b      | 0.0014   |      | 9    | 6        | 7 kinesin family member 5C                                                              |
| CGEF2       | LOC643900 |              | 0.0014   |      | 11   | 4        | 7                                                                                       |
| RBMS1       | RBMS1     | 2q24.2b      | 0.0014   |      | 10   | 5        | 7 RNA binding motif, single stranded interacting protein 1                              |
| PTPN4       | PTPN4     | 2q14.2c      | 0.0014   |      | 8    | 4        | 6 protein tyrosine phosphatase, non-receptor type 4 (megakaryocyte)                     |
| ERCC3       | ERCC3     | 2q14.3d      | 0.0014   |      | 7    | 5        | 6 excision repair cross-complementing rodent repair deficiency, complementation group 3 |
| ANAPC1      | LOC652635 |              | 0.0014   |      | 6    | 6        | 6 anaphase promoting complex subunit 1                                                  |
| CACNB4      | CACNB4    | 2q23.3c      | 0.0014   |      | 5    | 7        | 6 calcium channel, voltage-dependent, beta 4 subunit                                    |
| RNF126P1    | RNF126P1  | 17q22c       | 0.0015   |      | 99   | 4        | 28 ring finger protein 126 pseudogene 1                                                 |
| SCPEP1      | SCPEP1    | 17q22c       | 0.0015   |      | 99   | 4        | 28 serine carboxypeptidase 1                                                            |
| DMRTA2      | DMRTA2    | 1p33a        | 0.0016   |      | 28   | 21       | 16 DMRT-like family A2                                                                  |
| CYP2J2      | CYP2J2    | 1p32.1c      | 0.0016   |      | 30   | 19       | 16 cytochrome P450, family 2, subfamily J, polypeptide 2                                |
| FAF1        | FAF1      | 1p33a        | 0.0016   |      | 28   | 21       | 16 Fas (TNFRSF6) associated factor 1                                                    |
| TMEM49      | TMEM49    | 17q23.1a     | 0.0016   |      | 118  | 10       | 33                                                                                      |
| DYNC2L1     | DYNC2L1   | 2p21d        | 0.0016   |      | 17   | 5        | 9 dynein, cytoplasmic 2, light intermediate chain 1                                     |
| PLEKHH2     | PLEKHH2   | 2p21d        | 0.0016   |      | 17   | 5        | 9 pleckstrin homology domain containing, family H (with MyTH4 domain) member 2          |
| HLF         | HLF       | 17q22b       | 0.0016   |      | 89   | 5        | 26 hepatic leukemia factor                                                              |
| SH3BGR      | SH3BGR    | 21q22.2b     | 0.0017   |      | 28   | 13       | 14 SH3 domain binding glutamic acid-rich protein                                        |
| TRIM25      | TRIM25    | 17q22c       | 0.0018   |      | 100  | 4        | 28 tripartite motif containing 25                                                       |
| ACSF2       | FLJ20920  | 17q21.33b    | 0.0018   |      | 103  | 6        | 29 acyl-CoA synthetase family member 2                                                  |
| CHAD        | CHAD      | 17q21.33b    | 0.0018   |      | 103  | 6        | 29 chondroadherin                                                                       |
| RSAD1       | RSAD1     | 17q21.33b    | 0.0018   |      | 103  | 6        | 29 radical S-adenosyl methionine domain containing 1                                    |
| KIAA0622    | CLASP1    | 2q14.2e-q14. | 0.002    |      | 12   | 7        | 8 cytoplasmic linker associated protein 1                                               |
| HOOK1       | HOOK1     | 1p32.1c      | 0.002    |      | 30   | 20       | 16 hook homolog 1 (Drosophila)                                                          |
| C1orf87     | C1orf87   | 1p32.1b      | 0.002    |      | 32   | 18       | 16 chromosome 1 open reading frame 87                                                   |
| IDE         | IDE       | 10q23.33a    | 0.0021   |      | 3    | 27       | 11 insulin-degrading enzyme                                                             |
| FGGY        | FLJ10986  | 1p32.1d-p32  | 0.0021   |      | 29   | 17       | 15 FGGY carbohydrate kinase domain containing                                           |
| TBX2        | TBX2      | 17q23.2b     | 0.0022   |      | 124  | 6        | 33 T-box 2                                                                              |
| DEFB131     | DEFB131   | 4p16.1c      | 0.0022   |      | 17   | 25       | 14 defensin, beta 131                                                                   |
| DDX18       | DDX18     | 2q14.1d      | 0.0022   |      | 3    | 4        | 4 DEAD (Asp-Glu-Ala-Asp) box polypeptide 18                                             |
| PSMG1       | PSMG1     | 21q22.2a     | 0.0022   |      | 31   | 7        | 13 proteasome (prosome, macropain) assembly chaperone 1                                 |
| ETS2        | ETS2      | 21q22.2a     | 0.0022   |      | 30   | 8        | 13 v-ets erythroblastosis virus E26 oncogene homolog 2 (avian)                          |
| CIB4        | CIB4      | 2p23.3b      | 0.0022   |      | 29   | 9        | 13 calcium and integrin binding family member 4                                         |
| TMEM100     | TMEM100   | 17q22b       | 0.0023   |      | 89   | 2        | 25 transmembrane protein 100                                                            |

|            |            |             |        |     |    |                                                                                  |
|------------|------------|-------------|--------|-----|----|----------------------------------------------------------------------------------|
| HS6ST1     | HS6ST1     | 2q14.3e     | 0.0024 | 11  | 5  | 7 heparan sulfate 6-O-sulfotransferase 1                                         |
| WDR33      | WDR33      | 2q14.3e     | 0.0024 | 9   | 7  | 7 WD repeat domain 33                                                            |
| SFT2D3     | SFT2D3     | 2q14.3e     | 0.0024 | 11  | 5  | 7 SFT2 domain containing 3                                                       |
| NMS        | NMS        | 2q11.2d     | 0.0024 | 9   | 7  | 7 neuromedin S                                                                   |
| MBD5       | MBD5       | 2q23.1a     | 0.0024 | 9   | 7  | 7 methyl-CpG binding domain protein 5                                            |
| ADARB1     | ADARB1     | 21q22.3e    | 0.0024 | 50  | 5  | 17 adenosine deaminase, RNA-specific, B1                                         |
| KRTAP10-9  | KRTAP10-9  | 21q22.3d    | 0.0024 | 48  | 7  | 17 keratin associated protein 10-9                                               |
| PPM1E      | PPM1E      | 17q22d      | 0.0025 | 88  | 18 | 28 protein phosphatase, Mg2+/Mn2+ dependent, 1E                                  |
| TRIM37     | TRIM37     | 17q22d      | 0.0025 | 88  | 18 | 28 tripartite motif containing 37                                                |
| DLX4       | DLX4       | 17q21.33a   | 0.0025 | 100 | 6  | 28 distal-less homeobox 4                                                        |
| PRR11      | PRR11      | 17q22d      | 0.0025 | 94  | 17 | 29 proline rich 11                                                               |
| MITD1      | MITD1      | 2q11.2c     | 0.0027 | 8   | 5  | 6 MIT, microtubule interacting and transport, domain containing 1                |
| MRPL30     | MRPL30     | 2q11.2c     | 0.0027 | 8   | 5  | 6 mitochondrial ribosomal protein L30                                            |
| EPB41L5    | EPB41L5    | 2q14.2c     | 0.0027 | 9   | 4  | 6 erythrocyte membrane protein band 4.1 like 5                                   |
| TGFBRAP1   | LOC644629  |             | 0.0027 | 7   | 6  | 6 transforming growth factor, beta receptor associated protein 1                 |
| FHL2       | FHL2       | 2q12.2a     | 0.0027 | 7   | 6  | 6 four and a half LIM domains 2                                                  |
| C2orf49    | C2orf49    | 2q12.2a     | 0.0027 | 7   | 6  | 6 chromosome 2 open reading frame 49                                             |
| TXNDC9     | LOC285453  | 4q12e       | 0.0027 | 8   | 5  | 6 thioredoxin domain containing 9                                                |
| BCL2L11    | BCL2L11    | 2q13c       | 0.0027 | 7   | 6  | 6 BCL2-like 11 (apoptosis facilitator)                                           |
| RND3       | RND3       | 2q23.3a     | 0.0027 | 5   | 8  | 6 Rho family GTPase 3                                                            |
| BX119026   | LOC339782  |             | 0.0027 | 5   | 8  | 6                                                                                |
| MAP2K6     | MAP2K6     | 17q24.3a    | 0.0027 | 87  | 5  | 25 mitogen-activated protein kinase kinase 6                                     |
| DBI        | DBI        | 2q14.2b     | 0.0027 | 7   | 3  | 5 diazepam binding inhibitor (GABA receptor modulator, acyl-CoA binding protein) |
| GYPC       | GYPC       | 2q14.3d     | 0.0027 | 6   | 4  | 5 glycoporin C (Gerbich blood group)                                             |
| PLGLA      | PLGLA      | 2q12.2b     | 0.0027 | 4   | 6  | 5 plasminogen-like A                                                             |
| CYP27C1    | CYP27C1    | 2q14.3d     | 0.0027 | 6   | 4  | 5 cytochrome P450, family 27, subfamily C, polypeptide 1                         |
| NPEPPS     | NPEPPS     | 17q21.32b   | 0.0028 | 35  | 25 | 18 aminopeptidase puromycin sensitive                                            |
| MMD        | MMD        | 17q22b      | 0.0028 | 91  | 6  | 26 monocyte to macrophage differentiation-associated                             |
| COIL       | COIL       | 17q22c      | 0.0029 | 98  | 4  | 27 coilin                                                                        |
| AKIRIN1    | AKIRIN1    | 1p34.3a     | 0.0029 | 22  | 21 | 14 akirin 1                                                                      |
| ELAVL4     | ELAVL4     | 1p33a       | 0.0029 | 27  | 16 | 14 ELAV (embryonic lethal, abnormal vision, Drosophila)-like 4 (Hu antigen D)    |
| ADCY3      | ADCY3      | 2p23.3c     | 0.0029 | 32  | 11 | 14 adenylate cyclase 3                                                           |
| CENPO      | CENPO      | 2p23.3c     | 0.0029 | 32  | 11 | 14 centromere protein O                                                          |
| DLX3       | DLX3       | 17q21.33a   | 0.0029 | 101 | 6  | 28 distal-less homeobox 3                                                        |
| DKFzP762C1 | UBE2Q2     | 15q24.2a    | 0.0029 | 12  | 19 | 11 ubiquitin-conjugating enzyme E2Q family member 2                              |
| RPL7A      | LOC647949  |             | 0.0029 | 13  | 18 | 11 ribosomal protein L7a                                                         |
| SERTAD2    | SERTAD2    | 2p14c       | 0.0029 | 26  | 5  | 11 SERTA domain containing 2                                                     |
| PCDH7      | PCDH7      | 4p15.1e-p15 | 0.003  | 2   | 37 | 13 protocadherin 7                                                               |
| C2orf70    | LOC339778  | 2p23.3b     | 0.003  | 30  | 9  | 13 chromosome 2 open reading frame 70                                            |
| LRIG2      | LRIG2      | 1p13.2c     | 0.003  | 14  | 21 | 12 leucine-rich repeats and immunoglobulin-like domains 2                        |
| DQ894659   | TAF1B      | 2p25.1d     | 0.003  | 30  | 5  | 12 TATA box binding protein (TBP)-associated factor, RNA polymerase I, B, 63kDa  |
| ISL2       | ISL2       | 15q24.3a    | 0.003  | 11  | 24 | 12 ISL LIM homeobox 2                                                            |
| KIAA1454   | SCAPER     | 15q24.3a    | 0.003  | 11  | 24 | 12 S-phase cyclin A-associated protein in the ER                                 |
| TAF1B      | TAF1B      | 2p25.1d     | 0.003  | 30  | 5  | 12 TATA box binding protein (TBP)-associated factor, RNA polymerase I, B, 63kDa  |
| RSAD2      | RSAD2      | 2p25.2a     | 0.003  | 30  | 5  | 12 radical S-adenosyl methionine domain containing 2                             |
| CMPK2      | CMPK2      | 2p25.2a     | 0.003  | 30  | 5  | 12 cytidine monophosphate (UMP-CMP) kinase 2, mitochondrial                      |
| LONRF2     | LONRF2     | 2q11.2d     | 0.0031 | 15  | 5  | 8 LON peptidase N-terminal domain and ring finger 2                              |
| BX648246   | LOC648293  |             | 0.0031 | 15  | 5  | 8                                                                                |
| BC037862   | LOC648293  |             | 0.0031 | 15  | 5  | 8                                                                                |
| FIGN       | FIGN       | 2q24.3a     | 0.0031 | 11  | 9  | 8 fidgetin                                                                       |
| TRIML2     | TRIML2     | 4q35.2b     | 0.0033 | 3   | 49 | 16 tripartite motif family-like 2                                                |
| TRIML1     | TRIML1     | 4q35.2c     | 0.0033 | 3   | 49 | 16 tripartite motif family-like 1                                                |
| VEZF1      | VEZF1      | 17q22d      | 0.0034 | 99  | 4  | 27 vascular endothelial zinc finger 1                                            |
| AK097513   | FLJ40194   | 17q21.32c   | 0.0034 | 91  | 12 | 27 uncharacterized FLJ40194                                                      |
| TAC4       | TAC4       | 17q21.33a   | 0.0035 | 101 | 7  | 28 tachykinin 4 (hemokinin)                                                      |
| COL1A1     | COL1A1     | 17q21.33a   | 0.0035 | 102 | 6  | 28 collagen, type I, alpha 1                                                     |
| LRRC59     | LRRC59     | 17q21.33b   | 0.0035 | 103 | 5  | 28 leucine rich repeat containing 59                                             |
| EME1       | EME1       | 17q21.33b   | 0.0035 | 103 | 5  | 28 essential meiotic endonuclease 1 homolog 1 (S. pombe)                         |
| CARD11     | CARD11     | 7p22.2b     | 0.0035 | 52  | 9  | 18 caspase recruitment domain family, member 11                                  |
| PTTG1IP    | PTTG1IP    | 21q22.3d-q2 | 0.0035 | 56  | 5  | 18 pituitary tumor-transforming 1 interacting protein                            |
| YPEL2      | YPEL2      | 17q22d      | 0.0035 | 111 | 12 | 31 yippee-like 2 (Drosophila)                                                    |
| PCDHA6     | PCDHA8     | 5q31.3b     | 0.0036 | 12  | 36 | 15 protocadherin alpha 6                                                         |
| ID2        | ID2        | 2p25.1e     | 0.0038 | 39  | 5  | 14 inhibitor of DNA binding 2, dominant negative helix-loop-helix protein        |
| DPP10      | DPP10      | 2q14.1a-q14 | 0.0038 | 6   | 11 | 7 dipeptidyl-peptidase 10 (non-functional)                                       |
| LOC151121  | LOC151121  | 2q21.1a     | 0.0038 | 12  | 5  | 7 uncharacterized LOC151121                                                      |
| SP3        | SP3        | 2q31.1f     | 0.0038 | 13  | 4  | 7 Sp3 transcription factor                                                       |
| EPC2       | EPC2       | 2q23.1b     | 0.0038 | 7   | 10 | 7 enhancer of polycomb homolog 2 (Drosophila)                                    |
| GRB14      | GRB14      | 2q24.3b     | 0.0038 | 9   | 8  | 7 growth factor receptor-bound protein 14                                        |
| COBL1      | COBL1      | 2q24.3b     | 0.0038 | 9   | 8  | 7 COBL-like 1                                                                    |
| USP1       | USP1       | 1p31.3d     | 0.0038 | 32  | 25 | 17 ubiquitin specific peptidase 1                                                |
| NME1       | NME1       | 17q21.33b   | 0.0038 | 87  | 7  | 25 non-metastatic cells 1, protein (NM23A) expressed in                          |
| MMRN2      | MMRN2      | 10q23.2a    | 0.0039 | 11  | 17 | 10 multimerin 2                                                                  |
| KIF11      | KIF11      | 10q23.33a   | 0.0039 | 3   | 25 | 10 kinesin family member 11                                                      |
| CSGALNACT2 | CSGALNACT2 | 10q11.21a   | 0.0039 | 34  | 6  | 13 chondroitin sulfate N-acetylgalactosaminyltransferase 2                       |
| C17orf82   | C17orf82   | 17q23.2b    | 0.004  | 123 | 6  | 32 chromosome 17 open reading frame 82                                           |
| SFRS1      | SFRS1      | 17q22d      | 0.004  | 100 | 4  | 27                                                                               |
| STIL       | STIL       | 1p33d       | 0.004  | 21  | 15 | 12 SCL/TAL1 interrupting locus                                                   |
| OTOF       | OTOF       | 2p23.3b     | 0.004  | 23  | 9  | 11 otoferlin                                                                     |
| BMPR1A     | BMPR1A     | 10q23.2a    | 0.004  | 15  | 17 | 11 bone morphogenetic protein receptor, type IA                                  |
| GUF1       | GUF1       | 4p13b       | 0.004  | 7   | 25 | 11 GUF1 GTPase homolog (S. cerevisiae)                                           |
| GNPDA2     | GNPDA2     | 4p13b       | 0.004  | 7   | 25 | 11 glucosamine-6-phosphate deaminase 2                                           |
| YIPF7      | YIPF7      | 4p13b       | 0.004  | 7   | 25 | 11 Yip1 domain family, member 7                                                  |
| PTRH2      | PTRH2      | 17q23.1a    | 0.0041 | 114 | 10 | 31 peptidyl-tRNA hydrolase 2                                                     |
| CLTC       | CLTC       | 17q23.1a    | 0.0041 | 114 | 10 | 31 clathrin, heavy chain (Hc)                                                    |
| FAM33A     | FAM33A     | 17q22d      | 0.0041 | 92  | 17 | 28                                                                               |
| ITGA3      | ITGA3      | 17q21.33a   | 0.0041 | 103 | 6  | 28 integrin, alpha 3 (antigen CD49C, alpha 3 subunit of VLA-3 receptor)          |
| XVLT2      | XVLT2      | 17q21.33b   | 0.0041 | 104 | 5  | 28 xylosyltransferase II                                                         |
| MRPL27     | MRPL27     | 17q21.33b   | 0.0041 | 104 | 5  | 28 mitochondrial ribosomal protein L27                                           |
| ORC1L      | ORC1L      | 1p32.3d     | 0.0042 | 27  | 26 | 16                                                                               |
| CC2D1B     | CC2D1B     | 1p32.3d     | 0.0042 | 27  | 26 | 16 coiled-coil and C2 domain containing 1B                                       |
| PRPF38A    | PRPF38A    | 1p32.3d     | 0.0042 | 27  | 26 | 16 PRP38 pre-mRNA processing factor 38 (yeast) domain containing A               |
| ZCCHC11    | ZCCHC11    | 1p32.3d     | 0.0042 | 27  | 26 | 16 zinc finger, CCHC domain containing 11                                        |
| MYO10      | MYO10      | 5p15.1b     | 0.0043 | 54  | 8  | 18 myosin X                                                                      |
| UBE2G2     | UBE2G2     | 21q22.3d    | 0.0043 | 55  | 7  | 18 ubiquitin-conjugating enzyme E2G 2                                            |
| STXBP4     | STXBP4     | 17q22b      | 0.0044 | 84  | 6  | 24 syntaxin binding protein 4                                                    |
| UTP18      | UTP18      | 17q21.33c   | 0.0044 | 84  | 6  | 24 UTP18 small subunit (SSU) processome component homolog (yeast)                |
| TXNDC12    | TXNDC12    | 1p32.3e-p32 | 0.0045 | 23  | 26 | 15 thioredoxin domain containing 12 (endoplasmic reticulum)                      |
| RET        | RET        | 10q11.21a   | 0.0045 | 41  | 8  | 15 ret proto-oncogene                                                            |
| TSGA10     | TSGA10     | 2q11.2c     | 0.0046 | 9   | 5  | 6 testis specific, 10                                                            |
| DQ895307   | TSGA10     | 2q11.2c     | 0.0046 | 9   | 5  | 6                                                                                |

|            |            |             |        |     |    |                                                                                |
|------------|------------|-------------|--------|-----|----|--------------------------------------------------------------------------------|
| LYG2       | LYG2       | 2q11.2c     | 0.0046 | 9   | 5  | 6 lysozyme G-like 2                                                            |
| LYG1       | LYG1       | 2q11.2c     | 0.0046 | 9   | 5  | 6 lysozyme G-like 1                                                            |
| ZAK        | ZAK        | 2q31.1e     | 0.0046 | 10  | 4  | 6 sterile alpha motif and leucine zipper containing kinase AZK                 |
| MMADHC     | C2orf25    | 2q23.2a     | 0.0046 | 6   | 8  | 6 methylmalonic aciduria (cobalamin deficiency) cblD type, with homocystinuria |
| ABCG8      | ABCG8      | 2p21d       | 0.0047 | 16  | 5  | 8 ATP-binding cassette, sub-family G (WHITE), member 8                         |
| LRPPRC     | LRPPRC     | 2p21d       | 0.0047 | 16  | 5  | 8 leucine-rich pentatricopeptide repeat containing                             |
| ABCG5      | ABCG5      | 2p21d       | 0.0047 | 16  | 5  | 8 ATP-binding cassette, sub-family G (WHITE), member 5                         |
| MYOF       | FER1L3     | 10q23.33a-q | 0.0047 | 4   | 17 | 8 myoferlin                                                                    |
| CCDC74A    | CCDC74B    | 2q21.1b     | 0.0047 | 15  | 6  | 8 coiled-coil domain containing 74A                                            |
| IFIH1      | IFIH1      | 2q24.2d     | 0.0047 | 13  | 8  | 8 interferon induced with helicase C domain 1                                  |
| KCNH7      | KCNH7      | 2q24.2d     | 0.0047 | 12  | 9  | 8 potassium voltage-gated channel, subfamily H (eag-related), member 7         |
| ZNF652     | ZNF652     | 17q21.32c   | 0.0047 | 94  | 11 | 27 zinc finger protein 652                                                     |
| SGCA       | SGCA       | 17q21.33a   | 0.0048 | 104 | 6  | 28 sarcoglycan, alpha (50kDa dystrophin-associated glycoprotein)               |
| HILS1      | HILS1      | 17q21.33a   | 0.0048 | 104 | 6  | 28 histone linker H1 domain, spermatid-specific 1, pseudogene                  |
| PKD2       | PKD2       | 17q21.33a   | 0.0048 | 104 | 6  | 28 pyruvate dehydrogenase kinase, isozyme 2                                    |
| PPP1R9B    | PPP1R9B    | 17q21.33a   | 0.0048 | 104 | 6  | 28 protein phosphatase 1, regulatory subunit 9B                                |
| SAMD14     | SAMD14     | 17q21.33a   | 0.0048 | 104 | 6  | 28 sterile alpha motif domain containing 14                                    |
| AMAP-1     | MYCBPAP    | 17q21.33b   | 0.0048 | 104 | 6  | 28 MYCBP associated protein                                                    |
| EIF4G3     | EIF4G3     | 1p36.12b    | 0.0048 | 2   | 43 | 14 eukaryotic translation initiation factor 4 gamma, 3                         |
| DR1        | DR1        | 1p22.1b     | 0.0048 | 14  | 31 | 14 down-regulator of transcription 1, TBP-binding (negative cofactor 2)        |
| LOC1001285 | LOC649813  |             | 0.0051 | 82  | 4  | 23 uncharacterized LOC100128571                                                |
| LCASL      | LCASL      | 21q22.2b    | 0.0051 | 30  | 11 | 13 Leber congenital amaurosis 5-like                                           |
| WRB        | WRB        | 21q22.2b    | 0.0051 | 30  | 11 | 13 tryptophan rich basic protein                                               |
| BG000842   | LOC653188  | 5q13.2a     | 0.0051 | 5   | 36 | 13                                                                             |
| MARCO      | MARCO      | 2q14.2b     | 0.0051 | 6   | 2  | 4 macrophage receptor with collagenous structure                               |
| ANKRD57    | ANKRD57    | 2q13a       | 0.0052 | 7   | 4  | 5                                                                              |
| SLCSA7     | SLCSA7     | 2q12.3c     | 0.0052 | 4   | 7  | 5 solute carrier family 5 (choline transporter), member 7                      |
| Sep-10     | Sep-10     | 2q13a       | 0.0052 | 7   | 4  | 5 septin 10                                                                    |
| TEKT4      | TEKT4      | 2q11.1c     | 0.0052 | 9   | 2  | 5 tektin 4                                                                     |
| POU3F3     | POU3F3     | 2q12.1d     | 0.0052 | 5   | 6  | 5 POU class 3 homeobox 3                                                       |
| STAM2      | STAM2      | 2q23.3c     | 0.0052 | 4   | 7  | 5 signal transducing adaptor molecule (SH3 domain and ITAM motif) 2            |
| ATP8A1     | ATP8A1     | 4p13c       | 0.0052 | 2   | 23 | 9 ATPase, aminophospholipid transporter (APLT), class I, type 8A, member 1     |
| ABCA5      | ABCA5      | 17q24.3a    | 0.0052 | 83  | 8  | 24 ATP-binding cassette, sub-family A (ABC1), member 5                         |
| KRTAP10-8  | KRTAP10-8  | 21q22.3d    | 0.0052 | 47  | 7  | 16 keratin associated protein 10-8                                             |
| SLC1A7     | SLC1A7     | 1p32.3c     | 0.0052 | 38  | 16 | 16 solute carrier family 1 (glutamate transporter), member 7                   |
| PODN       | PODN       | 1p32.3c     | 0.0052 | 38  | 16 | 16 podocan                                                                     |
| KRTAP12-3  | KRTAP12-3  | 21q22.3d    | 0.0052 | 47  | 7  | 16 keratin associated protein 12-3                                             |
| KRTAP12-2  | KRTAP12-2  | 21q22.3d    | 0.0052 | 47  | 7  | 16 keratin associated protein 12-2                                             |
| KRTAP10-10 | KRTAP10-10 | 21q22.3d    | 0.0052 | 47  | 7  | 16 keratin associated protein 10-10                                            |
| KRTAP10-11 | KRTAP10-11 | 21q22.3d    | 0.0052 | 47  | 7  | 16 keratin associated protein 10-11                                            |
| KRTAP12-4  | KRTAP12-4  | 21q22.3d    | 0.0052 | 47  | 7  | 16 keratin associated protein 12-4                                             |
| KRTAP12-1  | KRTAP12-1  | 21q22.3d    | 0.0052 | 47  | 7  | 16 keratin associated protein 12-1                                             |
| SPAG9      | SPAG9      | 17q21.33b   | 0.0054 | 91  | 5  | 25 sperm associated antigen 9                                                  |
| C10orf116  | C10orf116  | 10q23.2a    | 0.0054 | 12  | 17 | 10 chromosome 10 open reading frame 116                                        |
| EU176715   | SNCG       | 10q23.2a    | 0.0054 | 12  | 17 | 10 synuclein, gamma (breast cancer-specific protein 1)                         |
| FAM25A     | KIAA1975   | 10q23.2a-q2 | 0.0054 | 12  | 17 | 10 family with sequence similarity 25, member A                                |
| KIAA1975   | LOC643150  |             | 0.0054 | 12  | 17 | 10                                                                             |
| PPP2CA     | CDKL3      | 5q31.1d     | 0.0054 | 12  | 21 | 11 protein phosphatase 2, catalytic subunit, alpha isozyme                     |
| BCAS2      | BCAS2      | 1p13.2a     | 0.0054 | 15  | 18 | 11 breast carcinoma amplified sequence 2                                       |
| DENND2C    | DENND2C    | 1p13.2a     | 0.0054 | 15  | 18 | 11 DENN/MADD domain containing 2C                                              |
| C2orf39    | C2orf39    | 2p23.3b     | 0.0054 | 24  | 9  | 11                                                                             |
| FAM179A    | LOC165186  | 2p23.2a     | 0.0054 | 28  | 5  | 11 family with sequence similarity 179, member A                               |
| C2orf71    | FUJ34931   | 2p23.2a     | 0.0054 | 28  | 5  | 11 chromosome 2 open reading frame 71                                          |
| TMEM92     | TMEM92     | 17q21.33a   | 0.0055 | 101 | 5  | 27 transmembrane protein 92                                                    |
| PRKCA      | PRKCA      | 17q24.2a    | 0.0056 | 105 | 6  | 28 protein kinase C, alpha                                                     |
| NUP155     | NUP155     | 5p13.2b     | 0.0057 | 41  | 9  | 15 nucleoporin 155kDa                                                          |
| WDR70      | GUSBL2     | 6p11.2a     | 0.0057 | 41  | 9  | 15 WD repeat domain 70                                                         |
| ZBTB80S    | ZBTB80S    | 1p35.1b     | 0.0057 | 18  | 32 | 15 zinc finger and BTB domain containing 8 opposite strand                     |
| ZBTB8A     | ZBTB8      | 1p35.1b     | 0.0057 | 18  | 32 | 15 zinc finger and BTB domain containing 8A                                    |
| ZFP42      | ZFP42      | 4q35.2b     | 0.0057 | 4   | 46 | 15 zinc finger protein 42 homolog (mouse)                                      |
| SCP2       | SCP2       | 1p32.3d-p32 | 0.0057 | 28  | 22 | 15 sterol carrier protein 2                                                    |
| KTI12      | KTI12      | 1p32.3e     | 0.0057 | 24  | 26 | 15 KTI12 homolog, chromatin associated (S. cerevisiae)                         |
| PDE4B      | PDE4B      | 1p31.3b     | 0.0059 | 36  | 23 | 17 phosphodiesterase 4B, cAMP-specific                                         |
| ESSPL      | ESSPL      | 4q31.3b     | 0.0059 | 4   | 14 | 7                                                                              |
| AK130848   | LOC647606  |             | 0.0059 | 12  | 6  | 7                                                                              |
| ARHGAP15   | ARHGAP15   | 2q22.2a     | 0.0059 | 9   | 9  | 7 Rho GTPase activating protein 15                                             |
| PDCL3      | PDCL3      | 2q11.2d     | 0.0059 | 10  | 8  | 7 phosphducin-like 3                                                           |
| GCG        | GCG        | 2q24.2d     | 0.0059 | 10  | 8  | 7 glucagon                                                                     |
| DPP4       | DPP4       | 2q24.2d     | 0.0059 | 10  | 8  | 7 dipeptidyl-peptidase 4                                                       |
| ITGB6      | ITGB6      | 2q24.2b     | 0.0059 | 13  | 5  | 7 integrin, beta 6                                                             |
| TTC21B     | TTC21B     | 2q24.3c-q24 | 0.0059 | 11  | 7  | 7 tetrapeptide repeat domain 21B                                               |
| HOXD1      | HOXD1      | 2q31.1h     | 0.0059 | 13  | 5  | 7 homeobox D1                                                                  |
| SLC38A11   | SLC38A11   | 2q24.3b-q24 | 0.0059 | 10  | 8  | 7 solute carrier family 38, member 11                                          |
| CSRNP3     | FAM130A2   | 2q24.3c     | 0.0059 | 11  | 7  | 7 cysteine-serine-rich nuclear protein 3                                       |
| TOM1L1     | TOM1L1     | 17q22b      | 0.006  | 80  | 7  | 23 target of myb1 (chicken)-like 1                                             |
| COX11      | COX11      | 17q22b      | 0.006  | 80  | 7  | 23 COX11 cytochrome c oxidase assembly homolog (yeast)                         |
| CREM       | CREM       | 10p11.21c   | 0.0062 | 37  | 9  | 14 cAMP responsive element modulator                                           |
| HEATR6     | HEATR6     | 17q23.1a    | 0.0063 | 119 | 8  | 31 HEAT repeat containing 6                                                    |
| DHX40P     | TBC1D3B    | 17q12b      | 0.0063 | 119 | 8  | 31 TBC1 domain family, member 3B                                               |
| USP32      | LOC650546  |             | 0.0064 | 114 | 8  | 30 ubiquitin specific peptidase 32                                             |
| ABI3       | ABI3       | 17q21.32c   | 0.0064 | 89  | 13 | 26 ABI family, member 3                                                        |
| PHOSPHO1   | PHOSPHO1   | 17q21.32c   | 0.0064 | 89  | 13 | 26 phosphatase, orphan 1                                                       |
| TLK2       | LOC641806  |             | 0.0064 | 109 | 8  | 29 tousled-like kinase 2                                                       |
| SPATA20    | SPATA20    | 17q21.33b   | 0.0065 | 101 | 6  | 27 spermatogenesis associated 20                                               |
| POFUT2     | POFUT2     | 21q22.3e    | 0.0065 | 59  | 5  | 18 protein O-fucosyltransferase 2                                              |
| C17orf57   | C17orf57   | 17q21.32a-q | 0.0065 | 31  | 24 | 16 chromosome 17 open reading frame 57                                         |
| UNQ2783    | MGC52498   | 1p32.3d     | 0.0065 | 30  | 25 | 16                                                                             |
| C1orf163   | C1orf163   | 1p32.3d     | 0.0065 | 30  | 25 | 16                                                                             |
| ZYG11B     | ZYG11B     | 1p32.3d     | 0.0065 | 28  | 27 | 16 zyg-11 homolog B (C. elegans)                                               |
| FAM159A    | FAM159A    | 1p32.3d     | 0.0065 | 30  | 25 | 16 family with sequence similarity 159, member A                               |
| GPX7       | GPX7       | 1p32.3d     | 0.0065 | 30  | 25 | 16 glutathione peroxidase 7                                                    |
| ATG4C      | ATG4C      | 1p31.3c     | 0.0065 | 30  | 25 | 16 ATG4 autophagy related 4 homolog C (S. cerevisiae)                          |
| SLC44A5    | SLC44A5    | 1p31.1g     | 0.0066 | 15  | 27 | 13 solute carrier family 44, member 5                                          |
| LHX8       | LHX8       | 1p31.1g     | 0.0066 | 15  | 27 | 13 LIM homeobox 8                                                              |
| BEND5      | C1orf165   | 1p33b       | 0.0066 | 25  | 17 | 13 BEN domain containing 5                                                     |
| HMG1       | HMG1       | 21q22.2b    | 0.0066 | 31  | 11 | 13 high mobility group nucleosome binding domain 1                             |
| RPS7P4     | LOC149224  | 1p31.3a     | 0.0066 | 22  | 20 | 13 ribosomal protein S7 pseudogene 4                                           |
| LOC645291  | LOC645291  | 1p31.3a     | 0.0066 | 24  | 18 | 13                                                                             |
| MAB21L2    | MAB21L2    | 4q31.3a     | 0.0068 | 4   | 18 | 8 mab-21-like 2 (C. elegans)                                                   |
| BEND4      | CCDC4      | 4p13d       | 0.0068 | 1   | 21 | 8 BEN domain containing 4                                                      |

|            |            |              |        |     |    |                                                                                                                 |
|------------|------------|--------------|--------|-----|----|-----------------------------------------------------------------------------------------------------------------|
| CYP26C1    | CYP26C1    | 10q23.33a    | 0.0068 | 4   | 18 | 8 cytochrome P450, family 26, subfamily C, polypeptide 1                                                        |
| CYP26A1    | CYP26A1    | 10q23.33a    | 0.0068 | 4   | 18 | 8 cytochrome P450, family 26, subfamily A, polypeptide 1                                                        |
| BC157063   | CYP26A1    | 10q23.33a    | 0.0068 | 4   | 18 | 8                                                                                                               |
| THADA      | THADA      | 2p21e-p21d   | 0.0068 | 17  | 5  | 8 thyroid adenoma associated                                                                                    |
| SLC30A9    | SLC30A9    | 4p13d        | 0.0068 | 1   | 21 | 8 solute carrier family 30 (zinc transporter), member 9                                                         |
| SMPD4      | FLJ41352   | 2q21.1d      | 0.0068 | 16  | 6  | 8 sphingomyelin phosphodiesterase 4, neutral membrane (neutral sphingomyelinase-3)                              |
| TUBA3D     | TUBA3D     | 2q21.1d      | 0.0068 | 16  | 6  | 8 tubulin, alpha 3d                                                                                             |
| FLJ14346   | LOC653904  |              | 0.0068 | 16  | 6  | 8                                                                                                               |
| FAM128A    | FAM128A    | 2q21.1d      | 0.0068 | 16  | 6  | 8                                                                                                               |
| ACVR2A     | ACVR2A     | 2q22.3c-q23. | 0.0068 | 10  | 12 | 8 activin A receptor, type IIA                                                                                  |
| ORC4L      | ORC4L      | 2q23.1a      | 0.0068 | 10  | 12 | 8                                                                                                               |
| AGBL4      | AGBL4      | 1p33c-p33b   | 0.0069 | 22  | 16 | 12 ATP/GTP binding protein-like 4                                                                               |
| KCTD8      | KCTD8      | 4p13b        | 0.0069 | 6   | 32 | 12 potassium channel tetramerisation domain containing 8                                                        |
| C2orf18    | C2orf18    | 2p23.3a      | 0.0069 | 30  | 8  | 12 chromosome 2 open reading frame 18                                                                           |
| CENPA      | CENPA      | 2p23.3a      | 0.0069 | 30  | 8  | 12 centromere protein A                                                                                         |
| ANGPTL3    | ANGPTL3    | 1p31.3d      | 0.007  | 37  | 32 | 19 angiopoietin-like 3                                                                                          |
| DQ896418   | COX11P     | 6p22.1b      | 0.0071 | 81  | 7  | 23                                                                                                              |
| ZYG11A     | ZYG11A     | 1p32.3d      | 0.0071 | 29  | 22 | 15 zyg-11 homolog A (C. elegans)                                                                                |
| ECHDC2     | ECHDC2     | 1p32.3d      | 0.0071 | 29  | 22 | 15 enoyl CoA hydratase domain containing 2                                                                      |
| RAB3B      | RAB3B      | 1p32.3e      | 0.0071 | 23  | 28 | 15 RAB3B, member RAS oncogene family                                                                            |
| NRD1       | NRD1       | 1p32.3e      | 0.0071 | 24  | 27 | 15 nardilysin (N-arginine dibasic convertase)                                                                   |
| SLC35D1    | SLC35D1    | 1p31.3a      | 0.0071 | 27  | 24 | 15 solute carrier family 35 (UDP-glucuronic acid/UDP-N-acetylgalactosamine dual transporter), member D1         |
| SELI       | SELI       | 2p23.3b      | 0.0072 | 18  | 8  | 9                                                                                                               |
| N4BP2      | N4BP2      | 4p14b        | 0.0072 | 1   | 25 | 9 NEDD4 binding protein 2                                                                                       |
| KLHL5      | KLHL5      | 4p14c        | 0.0072 | 2   | 24 | 9 kelch-like 5 (Drosophila)                                                                                     |
| WDR36      | WDR36      | 5q22.1a      | 0.0072 | 12  | 22 | 11 WD repeat domain 36                                                                                          |
| TIAL1      | TIAL1      | 10q26.11d    | 0.0072 | 17  | 17 | 11 TIA1 cytotoxic granule-associated RNA binding protein-like 1                                                 |
| TUBB4Q     | LOC649679  |              | 0.0072 | 6   | 28 | 11                                                                                                              |
| AX747733   | LOC643396  |              | 0.0072 | 16  | 18 | 11                                                                                                              |
| DN994130   | LOC391037  | 1p33c        | 0.0072 | 19  | 15 | 11                                                                                                              |
| SLCSA9     | SLCSA9     | 1p33c        | 0.0072 | 19  | 15 | 11 solute carrier family 5 (sodium/glucose cotransporter), member 9                                             |
| CYP4Z2P    | LOC652843  |              | 0.0072 | 21  | 13 | 11 cytochrome P450, family 4, subfamily Z, polypeptide 2 pseudogene                                             |
| CYP4A11    | CYP4A11    | 1p33d        | 0.0072 | 21  | 13 | 11 cytochrome P450, family 4, subfamily A, polypeptide 11                                                       |
| KIDINS220  | KIDINS220  | 2p25.1e      | 0.0072 | 29  | 5  | 11 kinase D-interacting substrate, 220kDa                                                                       |
| GABRA4     | GABRA4     | 4p12b        | 0.0072 | 12  | 22 | 11 gamma-aminobutyric acid (GABA) A receptor, alpha 4                                                           |
| UNQ6975    | UNQ6975    |              | 0.0072 | 30  | 4  | 11 putative uncharacterized protein UNQ6975/PRO21958                                                            |
| CHRNA9     | CHRNA9     | 4p14a        | 0.0073 | 5   | 25 | 10 cholinergic receptor, nicotinic, alpha 9 (neuronal)                                                          |
| Mar-05     | Mar-05     | 10q23.32b    | 0.0073 | 4   | 26 | 10 membrane-associated ring finger (C3HC4) 5                                                                    |
| SAP130     | SAP130     | 2q14.3e      | 0.0074 | 8   | 7  | 6 Sin3A-associated protein, 130kDa                                                                              |
| POLR2D     | POLR2D     | 2q14.3e      | 0.0074 | 8   | 7  | 6 polymerase (RNA) II (DNA directed) polypeptide D                                                              |
| AMMECR1L   | AMMECR1L   | 2q14.3e      | 0.0074 | 8   | 7  | 6 AMME chromosomal region gene 1-like                                                                           |
| C2orf27B   | MGC50273   | 2q21.2a      | 0.0074 | 11  | 4  | 6 chromosome 2 open reading frame 27B                                                                           |
| C2orf27A   | LOC642669  | 14q11.1d     | 0.0074 | 11  | 4  | 6 chromosome 2 open reading frame 27A                                                                           |
| NBEA       | LOC647974  |              | 0.0074 | 11  | 4  | 6 neurobeachin                                                                                                  |
| MKI67IP    | MKI67IP    | 2q14.3a      | 0.0074 | 9   | 6  | 6 MKI67 (FHA domain) interacting nucleolar phosphoprotein                                                       |
| TSN        | TSN        | 2q14.3a      | 0.0074 | 9   | 6  | 6 translin                                                                                                      |
| DQ895626   | C2orf40    | 2q12.2b      | 0.0074 | 9   | 6  | 6 chromosome 2 open reading frame 40                                                                            |
| NAP5       | NAP5       | 2q21.2b-q21  | 0.0074 | 9   | 6  | 6                                                                                                               |
| GPR39      | GPR39      | 2q21.2b      | 0.0074 | 10  | 5  | 6 G protein-coupled receptor 39                                                                                 |
| MGAT4A     | MGAT4A     | 2q11.2c      | 0.0074 | 11  | 4  | 6 mannosyl (alpha-1,3-)-glycoprotein beta-1,4-N-acetylglucosaminyltransferase, isozyme A                        |
| CNGA3      | CNGA3      | 2q11.2c      | 0.0074 | 11  | 4  | 6 cyclic nucleotide gated channel alpha 3                                                                       |
| C2orf55    | MGC42367   | 2q11.2c      | 0.0074 | 11  | 4  | 6 chromosome 2 open reading frame 55                                                                            |
| VWA3B      | MGC26733   | 2q11.2b-q11  | 0.0074 | 11  | 4  | 6 von Willebrand factor A domain containing 3B                                                                  |
| CDCA7      | CDCA7      | 2q31.1e      | 0.0074 | 11  | 4  | 6 cell division cycle associated 7                                                                              |
| ITGA6      | ITGA6      | 2q31.1d      | 0.0074 | 10  | 5  | 6 integrin, alpha 6                                                                                             |
| LRP2       | LRP2       | 2q31.1a      | 0.0074 | 9   | 6  | 6 low density lipoprotein receptor-related protein 2                                                            |
| PLA2R1     | PLA2R1     | 2q24.2a-q24. | 0.0074 | 9   | 6  | 6 phospholipase A2 receptor 1, 180kDa                                                                           |
| DYNLL2     | DYNLL2     | 17q22d       | 0.0075 | 99  | 4  | 26 dynein, light chain, LC8-type 2                                                                              |
| AK095981   | LOC648302  |              | 0.0075 | 35  | 78 | 28                                                                                                              |
| MRPS23     | MRPS23     | 17q22d       | 0.0075 | 104 | 4  | 27 mitochondrial ribosomal protein S23                                                                          |
| CUEDC1     | CUEDC1     | 17q22d       | 0.0075 | 104 | 4  | 27 CUE domain containing 1                                                                                      |
| MYST2      | MYST2      | 17q21.33a    | 0.0075 | 100 | 8  | 27                                                                                                              |
| SRP14      | LOC644863  |              | 0.0075 | 100 | 8  | 27 signal recognition particle 14kDa (homologous Alu RNA binding protein)                                       |
| CACNA1G    | CACNA1G    | 17q21.33b    | 0.0075 | 102 | 6  | 27 calcium channel, voltage-dependent, T type, alpha 1G subunit                                                 |
| EPN3       | EPN3       | 17q21.33b    | 0.0075 | 102 | 6  | 27 epsin 3                                                                                                      |
| SNORD21    | SNORD21    | 1p22.1c      | 0.0078 | 12  | 35 | 14 small nucleolar RNA, C/D box 21                                                                              |
| LOC642852  | LOC642852  | 21q22.3e     | 0.0078 | 60  | 5  | 18 uncharacterized LOC642852                                                                                    |
| DOCK7      | DOCK7      | 1p31.3d-p31  | 0.0078 | 34  | 31 | 18 dedicator of cytokinesis 7                                                                                   |
| SMN2       | SMN2       | 5q13.2a      | 0.0084 | 5   | 38 | 13 survival of motor neuron 2, centromeric                                                                      |
| NAIP       | LOC651112  |              | 0.0084 | 5   | 38 | 13 NLR family, apoptosis inhibitory protein                                                                     |
| GUSBP1     | SMA4       | 5q13.2a      | 0.0084 | 5   | 38 | 13 glucuronidase, beta pseudogene 1                                                                             |
| SERF1B     | SERF1B     | 5q13.2a      | 0.0084 | 5   | 38 | 13 small EDRK-rich factor 1B (centromeric)                                                                      |
| SMN1       | SMN1       | 5q13.2b      | 0.0084 | 5   | 38 | 13 survival of motor neuron 1, telomeric                                                                        |
| ST6GALNAC3 | ST6GALNAC3 | 1p31.1g-p31. | 0.0084 | 18  | 25 | 13 ST6 (alpha-N-acetylneuraminyl-2,3-beta-galactosyl-1,3)-N-acetylgalactosaminide alpha-2,6-sialyltransferase 3 |
| SPATA6     | SPATA6     | 1p33c        | 0.0084 | 24  | 19 | 13 spermatogenesis associated 6                                                                                 |
| GPR177     | GPR177     | 1p31.3a      | 0.0084 | 24  | 19 | 13                                                                                                              |
| DIRAS3     | DIRAS3     | 1p31.3a      | 0.0084 | 23  | 20 | 13 DIRAS family, GTP-binding RAS-like 3                                                                         |
| C2orf79    | C2orf79    | 2p23.3c      | 0.0084 | 31  | 12 | 13                                                                                                              |
| NRP1       | NRP1       | 10p11.22a    | 0.0084 | 38  | 5  | 13 neuropilin 1                                                                                                 |
| C17orf73   | C17orf73   | 17q21.33b    | 0.0087 | 98  | 6  | 26                                                                                                              |
| MGAT5      | MGAT5      | 2q21.2d-q21  | 0.0088 | 13  | 6  | 7 mannosyl (alpha-1,6-)-glycoprotein beta-1,6-N-acetylglucosaminyltransferase                                   |
| LOC1001307 | LOC648682  |              | 0.0088 | 10  | 9  | 7                                                                                                               |
| GTDC1      | GTDC1      | 2q22.2a-q22. | 0.0088 | 10  | 9  | 7 glycosyltransferase-like domain containing 1                                                                  |
| PAIP2B     | PAIP2B     | 2p13.3b      | 0.0088 | 17  | 2  | 7 poly(A) binding protein interacting protein 2B                                                                |
| TANK       | TANK       | 2q24.2c      | 0.0088 | 11  | 8  | 7 TRAF family member-associated NFKB activator                                                                  |
| FAP        | FAP        | 2q24.2d      | 0.0088 | 11  | 8  | 7 fibroblast activation protein, alpha                                                                          |
| TBR1       | TBR1       | 2q24.2c      | 0.0088 | 10  | 9  | 7 T-box, brain, 1                                                                                               |
| SCN3A      | SCN3A      | 2q24.3c      | 0.0088 | 11  | 8  | 7 sodium channel, voltage-gated, type III, alpha subunit                                                        |
| ZNF2       | ZNF2       | 2q11.1c      | 0.0088 | 14  | 5  | 7 zinc finger protein 2                                                                                         |
| ZNF514     | ZNF514     | 2q11.1c      | 0.0088 | 14  | 5  | 7 zinc finger protein 514                                                                                       |
| TTC30B     | TTC30B     | 2q31.2a      | 0.0088 | 14  | 5  | 7 tetratricopeptide repeat domain 30B                                                                           |
| SCN2A      | SCN2A      | 2q24.3c      | 0.0088 | 11  | 8  | 7 sodium channel, voltage-gated, type II, alpha subunit                                                         |
| HLA-A      | HLA-A      | 6p21.33b     | 0.0088 | 43  | 9  | 15 major histocompatibility complex, class I, A                                                                 |
| BTF3L4     | BTF3L4     | 1p32.3d      | 0.0088 | 26  | 26 | 15 basic transcription factor 3-like 4                                                                          |
| ZFYVE9     | ZFYVE9     | 1p32.3d      | 0.0088 | 26  | 26 | 15 zinc finger, FYVE domain containing 9                                                                        |
| OSBPL9     | OSBPL9     | 1p32.3e      | 0.0088 | 25  | 27 | 15 oxysterol binding protein-like 9                                                                             |
| KRTAP10-12 | KRTAP10-12 | 21q22.3d     | 0.0088 | 45  | 7  | 15 keratin associated protein 10-12                                                                             |
| HS1BP3     | HS1BP3     | 2p24.1c      | 0.0088 | 42  | 10 | 15 HCLS1 binding protein 3                                                                                      |
| ANKRD20A1  | LOC730920  |              | 0.0089 | 10  | 2  | 5 ankyrin repeat domain 20 family, member A1                                                                    |
| C2orf15    | C2orf15    | 2q11.2c      | 0.0089 | 7   | 5  | 5 chromosome 2 open reading frame 15                                                                            |

|            |           |             |        |     |    |                                                                                                                   |
|------------|-----------|-------------|--------|-----|----|-------------------------------------------------------------------------------------------------------------------|
| SULT1C3    | SULT1C3   | 2q12.3c     | 0.0089 | 5   | 7  | 5 sulfotransferase family, cytosolic, 1C, member 3                                                                |
| SULT1C4    | SULT1C4   | 2q12.3c     | 0.0089 | 5   | 7  | 5 sulfotransferase family, cytosolic, 1C, member 4                                                                |
| LIMS3      | LOC729260 | 2q13b       | 0.0089 | 7   | 5  | 5 LIM and senescent cell antigen-like domains 3                                                                   |
| SULT1C2    | SULT1C2   | 2q12.3c     | 0.0089 | 5   | 7  | 5 sulfotransferase family, cytosolic, 1C, member 2                                                                |
| BM720600   | LOC653596 |             | 0.0089 | 7   | 5  | 5                                                                                                                 |
| AK096170   | LOC440895 | 2q13b       | 0.0089 | 7   | 5  | 5 two pore channel 3 pseudogene                                                                                   |
| MRP59      | MRP59     | 2q12.1d     | 0.0089 | 6   | 6  | 5 mitochondrial ribosomal protein 59                                                                              |
| AK125994   | FLJ44006  | 2q13c       | 0.0089 | 7   | 5  | 5 uncharacterized FLJ44006                                                                                        |
| ACOXL      | ACOXL     | 2q13c       | 0.0089 | 7   | 5  | 5 acyl-CoA oxidase-like                                                                                           |
| NEB        | LOC649199 |             | 0.0089 | 5   | 7  | 5 nebulin                                                                                                         |
| AX748125   | FU36116   | 1p13.2c     | 0.0089 | 16  | 23 | 12 uncharacterized LOC388666                                                                                      |
| DSCAM      | DSCAM     | 21q22.2b-q2 | 0.0089 | 29  | 10 | 12 Down syndrome cell adhesion molecule                                                                           |
| CASP3      | CASP3     | 4q35.1e     | 0.0089 | 7   | 32 | 12 caspase 3, apoptosis-related cysteine peptidase                                                                |
| OPN4       | OPN4      | 10q23.2a    | 0.0089 | 22  | 17 | 12 opsin 4                                                                                                        |
| LBP-32     | GRHL1     | 2p25.1d     | 0.0089 | 34  | 5  | 12 grainyhead-like 1 (Drosophila)                                                                                 |
| POMC       | POMC      | 2p23.3c     | 0.0089 | 29  | 10 | 12 proopiomelanocortin                                                                                            |
| DNMT3A     | DNMT3A    | 2p23.3c     | 0.0089 | 30  | 9  | 12 DNA (cytosine-5)-methyltransferase 3 alpha                                                                     |
| EFR3B      | KIAA0953  | 2p23.3c     | 0.0089 | 29  | 10 | 12 EFR3 homolog B (S. cerevisiae)                                                                                 |
| ARAP2      | CENTD1    | 4p14f       | 0.0089 | 6   | 33 | 12 ArfGAP with RhoGAP domain, ankyrin repeat and PH domain 2                                                      |
| WNT2B      | WNT2B     | 1p13.2c     | 0.0094 | 15  | 20 | 11 wingless-type MMTV integration site family, member 2B                                                          |
| DENN2D2    | DENN2D2   | 1p13.3a     | 0.0094 | 20  | 15 | 11 DENN/MADD domain containing 2D                                                                                 |
| CTTNBP2NL  | CTTNBP2NL | 1p13.2c     | 0.0094 | 15  | 20 | 11 CTTNBP2 N-terminal like                                                                                        |
| FRG1       | FRG1      | 4q35.2d     | 0.0094 | 7   | 28 | 11 FSHD region gene 1                                                                                             |
| LOC283788  | LOC283788 |             | 0.0094 | 7   | 28 | 11 FSHD region gene 1 pseudogene                                                                                  |
| CYP4Z1     | CYP4Z2P   | 1p33d       | 0.0094 | 22  | 13 | 11 cytochrome P450, family 4, subfamily Z, polypeptide 1                                                          |
| CYP4X1     | CYP4X1    | 1p33d       | 0.0094 | 22  | 13 | 11 cytochrome P450, family 4, subfamily X, polypeptide 1                                                          |
| AK124409   | FLJ42418  | 2p25.2a     | 0.0094 | 29  | 6  | 11                                                                                                                |
| ATP6V1E2   | ATP6V1E2  | 2p21b-p21a  | 0.0094 | 32  | 3  | 11 ATPase, H+ transporting, lysosomal 31kDa, V1 subunit E2                                                        |
| RHOQ       | RHOQ      | 2p21a       | 0.0094 | 32  | 3  | 11 ras homolog family member Q                                                                                    |
| GABRG1     | GABRG1    | 4p12b       | 0.0094 | 11  | 24 | 11 gamma-aminobutyric acid (GABA) A receptor, gamma 1                                                             |
| C21orf93   | C21orf93  | 21q22.3e    | 0.0094 | 61  | 5  | 18                                                                                                                |
| TBX4       | TBX4      | 17q23.2b    | 0.0095 | 125 | 5  | 31 T-box 4                                                                                                        |
| DKFZp76100 | CLIP4     | 2p23.2a     | 0.0095 | 20  | 3  | 8 CAP-GLY domain containing linker protein family, member 4                                                       |
| ALK        | ALK       | 2p23.2a-p23 | 0.0095 | 20  | 3  | 8 anaplastic lymphoma receptor tyrosine kinase                                                                    |
| KLF7       | KLF7      | 2q33.3c     | 0.0095 | 17  | 6  | 8 Kruppel-like factor 7 (ubiquitous)                                                                              |
| APC        | APC       | 5q22.2a     | 0.0097 | 12  | 36 | 14 adenomatous polyposis coli                                                                                     |
| RPL5       | FAM69A    | 1p22.1c     | 0.0097 | 13  | 35 | 14 ribosomal protein L5                                                                                           |
| AK091004   | PPP2R2B   | 5q32d-q32e  | 0.0097 | 23  | 25 | 14 protein phosphatase 2, regulatory subunit B, beta                                                              |
| CASC4      | CASC4     | 15q15.3c    | 0.0097 | 3   | 45 | 14 cancer susceptibility candidate 4                                                                              |
| CPT2       | CPT2      | 1p32.3c     | 0.0097 | 32  | 16 | 14 carnitine palmitoyltransferase 2                                                                               |
| C1orf123   | C1orf123  | 1p32.3c     | 0.0097 | 32  | 16 | 14 chromosome 1 open reading frame 123                                                                            |
| USP24      | USP24     | 1p32.3a     | 0.0097 | 35  | 13 | 14 ubiquitin specific peptidase 24                                                                                |
| PCSK9      | PCSK9     | 1p32.3a     | 0.0097 | 35  | 13 | 14 proprotein convertase subtilisin/kexin type 9                                                                  |
| CUL2       | CUL2      | 10p11.21c   | 0.0097 | 38  | 10 | 14 cullin 2                                                                                                       |
| H2AFY      | H2AFY     | 5q31.1f     | 0.0097 | 20  | 11 | 10 H2A histone family, member Y                                                                                   |
| FBXO22     | FBXO22    | 15q24.2a    | 0.0097 | 12  | 19 | 10 F-box protein 22                                                                                               |
| NRG4       | NRG4      | 15q24.2a    | 0.0097 | 12  | 19 | 10 neuregulin 4                                                                                                   |
| DQ894431   | GTF2A2    | 15q22.2a    | 0.0097 | 7   | 24 | 10 general transcription factor IIA, 2, 12kDa                                                                     |
| HS3ST1     | HS3ST1    | 4p15.33e    | 0.0097 | 5   | 26 | 10 heparan sulfate (glucosamine) 3-O-sulfotransferase 1                                                           |
| CEACAM20   | CEACAM20  | 19q13.31b   | 0.0097 | 19  | 12 | 10 carcinoembryonic antigen-related cell adhesion molecule 20                                                     |
| CB990789   | LOC649270 |             | 0.0098 | 37  | 20 | 16                                                                                                                |
| tcag7.935  | LOC389457 |             | 0.0098 | 48  | 9  | 16                                                                                                                |
| SLC6A17    | SLC6A17   | 1p13.3a     | 0.0098 | 39  | 18 | 16 solute carrier family 6, member 17                                                                             |
| TIFAB      | TIFAB     | 5q31.1f     | 0.0098 | 16  | 11 | 9 TRAF-interacting protein with forkhead-associated domain, family member B                                       |
| SLC25A26   | SLC25A26  | 3p14.1c     | 0.0098 | 7   | 20 | 9 solute carrier family 25, member 26                                                                             |
| LRIG1      | LRIG1     | 3p14.1c     | 0.0098 | 7   | 20 | 9 leucine-rich repeats and immunoglobulin-like domains 1                                                          |
| HADHB      | HADHB     | 2p23.3b     | 0.0098 | 19  | 8  | 9 hydroxyacyl-CoA dehydrogenase/3-ketoacyl-CoA thiolase/enoyl-CoA hydratase (trifunctional protein), beta subunit |
| GPR113     | GPR113    | 2p23.3b     | 0.0098 | 19  | 8  | 9 G protein-coupled receptor 113                                                                                  |
| PGM2       | PGM2      | 4p14d       | 0.0098 | 2   | 25 | 9 phosphoglucomutase 2                                                                                            |
| GRXCR1     | GRXCR1    | 4p13c       | 0.0098 | 4   | 23 | 9 glutaredoxin, cysteine rich 1                                                                                   |
| SH3RF3     | SH3MD4    | 2q13a       | 0.0098 | 21  | 6  | 9 SH3 domain containing ring finger 3                                                                             |
| SDHALP1    | SDHALP1   | 3q29f       | 0.0099 | 88  | 7  | 24                                                                                                                |
| METRNL     | METRNL    | 17q25.3h    | 0.0099 | 104 | 11 | 28 meteorin, glial cell differentiation regulator-like                                                            |
| ZC3H8      | ZC3H8     | 2q13d       | 0.01   | 4   | 5  | 4 zinc finger CCCH-type containing 8                                                                              |
| MERTK      | MERTK     | 2q13c-q13d  | 0.01   | 4   | 5  | 4 c-mer proto-oncogene tyrosine kinase                                                                            |
